# Supplementary material
Source: publisher site journal article supplement (https://www.spandidos-publications.com/8561/downloadSupplementary)
Supplement: Supplementary file 1 [file downloadSupplementary]

Table SI. Antibodies.

| Antibody                               | Supplier                           | Cat. no.   | Dilution |
|----------------------------------------|------------------------------------|------------|----------|
| Sirtuin 1                              | Proteintech Group, Inc.            | 13161-1-AP | 1:1,000  |
| NLRP3                                  | Proteintech Group, Inc.            | 27458-1-AP | 1:1,000  |
| NF- $\kappa$ B                         | Proteintech Group, Inc.            | 80979-1-RR | 1:5,000  |
| Caspase-3                              | ImmunoWay<br>Biotechnology Company | YM8058     | 1:1,000  |
| Macrophage migration inhibitory factor | Abcam                              | ab7207     | 1:2,000  |
| Caspase-9                              | Beyotime Biotechnology             | AF1264     | 1:1,000  |
| Vascular cell adhesion molecule 1      | Abcam                              | ab134047   | 1:2,000  |
| Organic cation transporter 2           | Abcam                              | ab179808   | 1:5,000  |
| p-p53                                  | Abcam                              | ab33889    | 1:1,000  |
| P-glycoprotein                         | Abcam                              | ab170904   | 1:1,000  |
| Intercellular adhesion molecule 1      | Abcam                              | ab282575   | 1:1,000  |
